# Supplementary material for: Umpolung catalyzed by organophosphines: efficient β,β-dimerization of vinylphosphonates affording linear dimers
Source: Royal Society of Chemistry journal article supplement (doi:10.1039/c2ra20704d), 2012-01-01

Supplementary Information

**Umpolung Catalyzed by Organophosphines: Efficient  $\beta,\beta$ -Dimerization of Vinylphosphonates Affording Linear Dimers**

Xiang-Bo Wang,<sup>a</sup> Yuta Saga,<sup>b</sup> Ruwei Shen,<sup>a</sup> Hiroyoshi Fujino,<sup>b</sup> Midori Goto,<sup>a</sup> and Li-Biao Han<sup>\*a</sup>

<sup>a</sup> National Institute of Advanced Industrial Science and Technology (AIST), Tsukuba, Ibaraki 305-8565, Japan

<sup>b</sup> Katayama Chemical Industries Co., Ltd, Amagasaki, Hyogo 660-0892, Japan

**Contents**

|                                                                                              |    |
|----------------------------------------------------------------------------------------------|----|
| <b>General Procedure for <math>\beta,\beta</math>-Addition of Vinylphosphonates (1)</b>      | S2 |
| <b>Structure determination of the isomers (a representative example)</b>                     | S2 |
| <b>Hydrogenation of 2b and 2b' to Produce (<i>R</i><sub>p</sub>, <i>R</i><sub>p</sub>)-3</b> | S4 |
| <b>Isomerization Experiments of 2c/2c'</b>                                                   | S4 |
| <b>Synthesis of 9 and 9a</b>                                                                 | S5 |
| <b>Reaction of Diethyl Vinylphosphonate (1c) with Aldehydes</b>                              | S6 |
| <b>Copies of NMR Charts of the Products</b>                                                  | S7 |

### General Procedure for $\beta,\beta$ -Addition of Vinylphosphonates (1)

General procedure for  $\beta,\beta$ -addition of vinylphosphonates (1): In a glove box, a glass tube was charged with vinylphosphonate (0.4 mmol) and 0.46 mL solvent, then sealed with a Teflon screw cap with a hole and rubber liner. After the tube was removed from the glove box,  $\text{PMe}_3/\text{THF}$  (1.0 mol/L, 0.04 mL) was injected into it with a syringe. The reaction was monitored by NMR. Removal of the solvent and  $\text{PMe}_3$  under a reduced pressure gave the crude product.  $\beta,\beta$ -adducts **2/2'** were obtained by passing the crude product through a short silica gel column using hexane then  $\text{CHCl}_3$  as eluent.

**Structure determination of the isomers (a representative example):** The structure of the products were determined on the basis of NMR spectra. Isomers **2c** and **2'e** could be distinguished by  $^1\text{H}$  NMR based on the chemical shifts and coupling constants of vinyl protons. The *E/Z* isomers of **2'e** was estimated based on the chemical shifts of their ally  $\text{CH}_2$  group (the *E* isomer is more downfield than the *Z* isomer: *Carbon-13 NMR Spectroscopy*, H.-O. Kalinowski, S. Berger, S. Braun, John Wiley & Sons, Chichester, 1988). Thus, the ratio of **2c/2'e** was based on the vinyl protons of  $^1\text{H}$  NMR (**2c**: 6.84–6.74 ppm (m, 1H), 5.76–5.69 ppm (m, 1H); **2'e**: 5.69–5.62 ppm (m, 2H)). The *E/Z* ratio of **2'e** was based on the  $^{31}\text{P}$  NMR (*Z*-**2'e**: 27.0 ppm; *E*-**2'e**: 26.8 ppm) and the allyl  $\text{CH}_2$  carbons of  $^{13}\text{C}$  NMR (*Z*-**2'e**: 27.5 ppm (dd,  $J_{\text{C,P}} = 23.8$  Hz); *E*-**2'e**: 31.5 ppm (dd,  $J_{\text{C,P}} = 142.6$  Hz)) (J. M. Kauffman, G. Moyna, *J. Org. Chem.* **2003**, 68, 839-853).

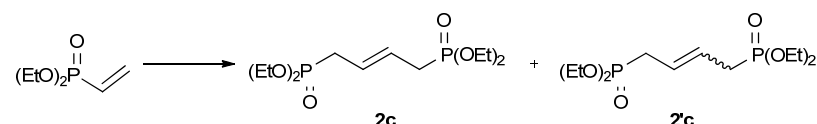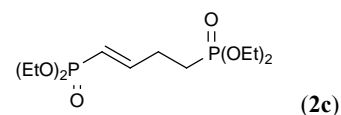

$^1\text{H}$  NMR (500 MHz,  $\text{CDCl}_3$ ):  $\delta$  6.84–6.74 (m, 1H), 5.76–5.69 (m, 1H), 4.14–4.06 (m, 8H), 2.72–2.51 (m, 2H), 1.92–1.85 (m, 2H), 1.38–1.32 (m, 12H).  $^{31}\text{P}$  NMR (200 MHz,  $\text{CDCl}_3$ ): 30.1, 17.9.  $^{13}\text{C}$  NMR (125 MHz,  $\text{CDCl}_3$ ):  $\delta$  151.8 (dd,  $J_{\text{C,P}} = 17.6$  Hz), 118.9 (d,  $J_{\text{C,P}} = 188.1$  Hz), 62.42 ( $J_{\text{C,P}} = 3.0$  Hz), 62.2 ( $J_{\text{C,P}} = 8.3$  Hz), 25.6 (dd,  $J_{\text{C,P}} = 4.1$  Hz), 24.9 ( $J_{\text{C,P}} = 142.7$  Hz), 16.74, 16.68.

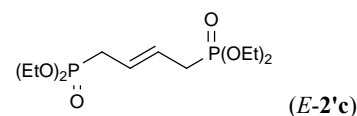

$^1\text{H}$  NMR (500 MHz,  $\text{CDCl}_3$ ):  $\delta$  5.69–5.62 (m, 2H), 4.14–4.06 (m, 8H), 2.72–2.51 (m, 4H), 1.38–1.32 (m, 12H).  $^{31}\text{P}$  NMR (200 MHz,  $\text{CDCl}_3$ ): 26.8.  $^{13}\text{C}$  NMR (125 MHz,  $\text{CDCl}_3$ ):  $\delta$  124.9 ( $J_{\text{C,P}} = 43.4$  Hz), 62.37 ( $J_{\text{C,P}} = 3.1$  Hz), 31.5 (dd,  $J_{\text{C,P}} = 142.6$  Hz), 16.8.

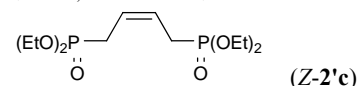

$^1\text{H}$  NMR (500 MHz,  $\text{CDCl}_3$ ):  $\delta$  5.69–5.62 (m, 2H), 4.14–4.06 (m, 8H), 2.72–2.51 (m, 4H), 1.38–1.32 (m, 12H).  $^{31}\text{P}$  NMR (200 MHz,  $\text{CDCl}_3$ ): 27.0.  $^{13}\text{C}$  NMR (125 MHz,  $\text{CDCl}_3$ ):  $\delta$  123.3 ( $J_{\text{C,P}} = 39.3$  Hz), 62.39 ( $J_{\text{C,P}} = 6.1$  Hz), 27.5 (dd,  $J_{\text{C,P}} = 23.8$  Hz), 16.8.

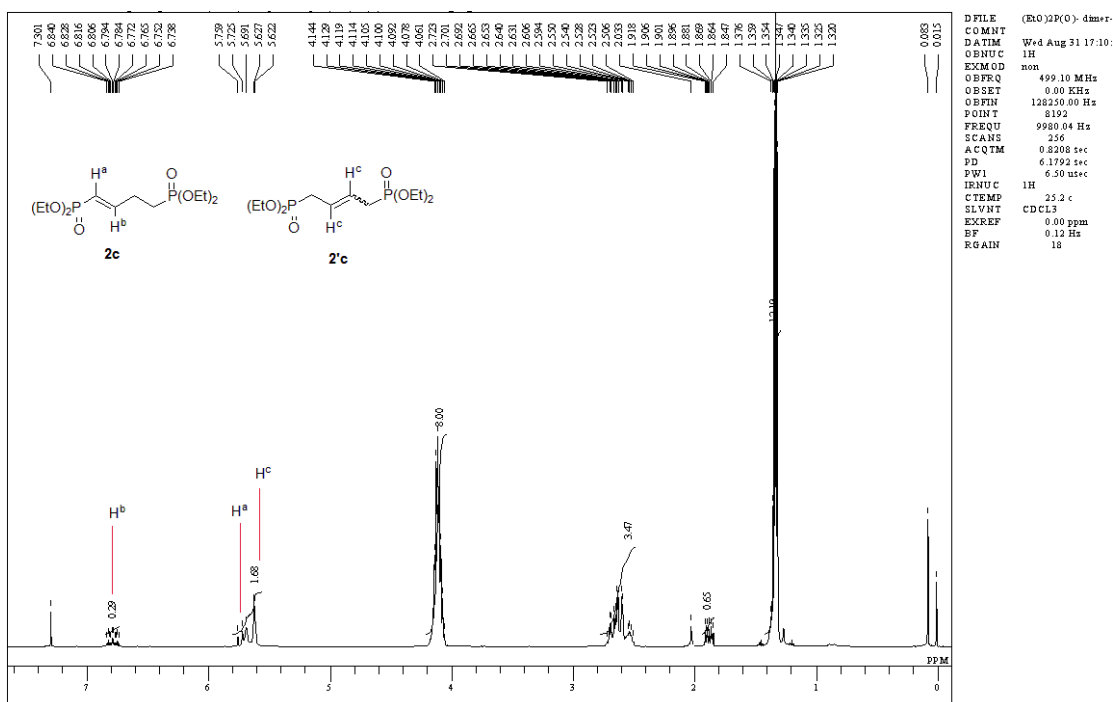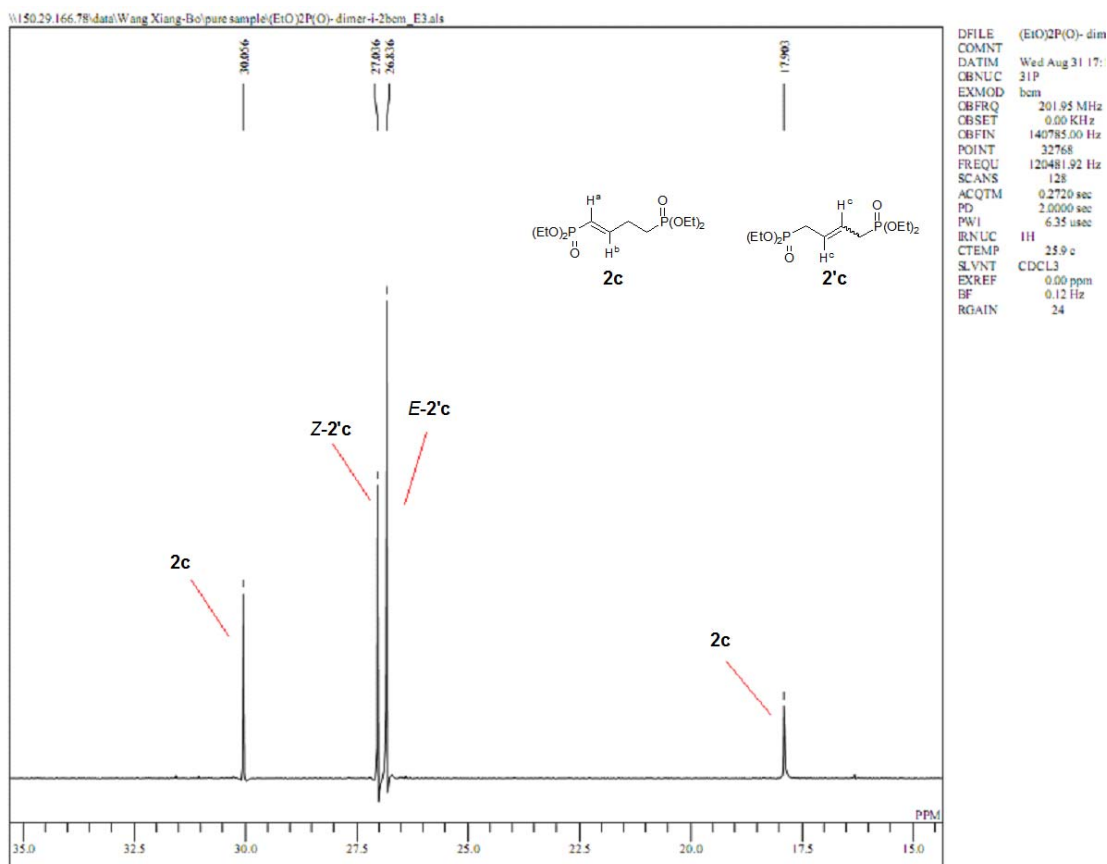

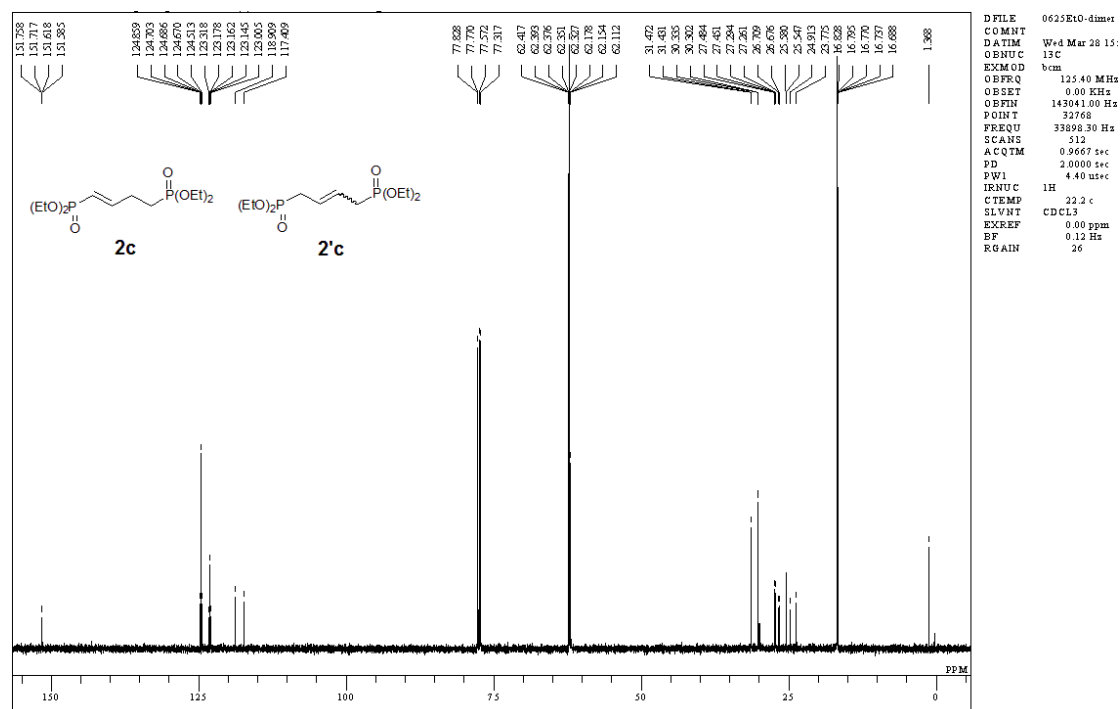

### Hydrogenation of 2b and 2b' to Produce (R<sub>p</sub>, R<sub>p</sub>)-3

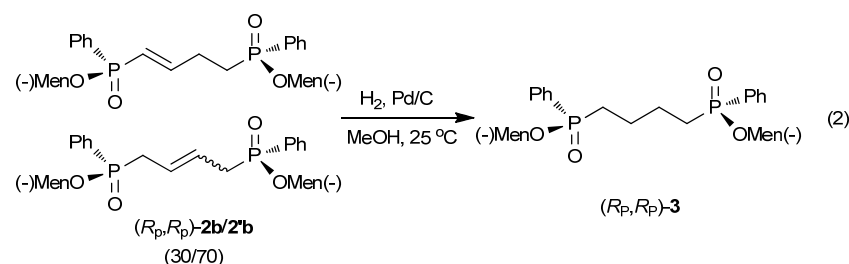

A solution of **2b/2b'** (0.25 g, 0.41 mmol) in 15 mL methanol was hydrogenated with 13 mg of 10% Pd/C under 5 atm of H<sub>2</sub> pressure at RT overnight. The reaction mixture was filtered and evaporated to remove the solvent and passed through a short silica gel column using CHCl<sub>3</sub> as eluent to give 0.242 g (97 % yield) of the product.

White solid, m.p. 159–160 °C. [ $\alpha$ ]<sub>D</sub><sup>23</sup> -24.2 (*c* 1.0, CHCl<sub>3</sub>). <sup>1</sup>H NMR (400 MHz, CDCl<sub>3</sub>):  $\delta$  7.74–7.68 (m, 4H), 7.54–7.42 (m, 6H), 5.39–5.37 (m, 2H), 4.38–4.20 (m, 2H), 2.78–2.44 (m, 4H), 2.23–2.19 (m, 2H), 1.77–1.61 (m, 4H), 1.77–1.61 (m, 4H), 1.40–1.29 (m, 4H), 1.03–0.75 (m, 24H). <sup>31</sup>P NMR (200 MHz, CDCl<sub>3</sub>): 42.1. <sup>13</sup>C NMR (100 MHz, CDCl<sub>3</sub>):  $\delta$  133.4 (*J*<sub>C,P</sub> = 123.0 Hz), 131.8, 131.3 (*J*<sub>C,P</sub> = 9.5 Hz), 128.4 (*J*<sub>C,P</sub> = 12.4 Hz), 48.8 (*J*<sub>C,P</sub> = 5.7 Hz), 43.1, 34.0, 31.4, 30.6 (*J*<sub>C,P</sub> = 100.1 Hz), 25.7, (dd, *J*<sub>C,P</sub> = 2.8 Hz, *J*<sub>C,P</sub> = 18.1 Hz), 22.8, 21.9, 21.1, 15.7.

### Isomerization Experiments of 2c/2c'

The dimers **2c/2c'** (55/45) (105 mg, 0.32 mmol) was dissolved in 0.4 mL THF-*d*<sub>8</sub> in a sealed NMR tube, Then PMe<sub>3</sub> (33  $\mu$ L, 0.32 mmol) was injected with a syringe. After heating at 60 °C for 12h, 24h and 48h, the dimer-isomer ratio was checked by <sup>1</sup>H NMR spectra. (Figure 1).

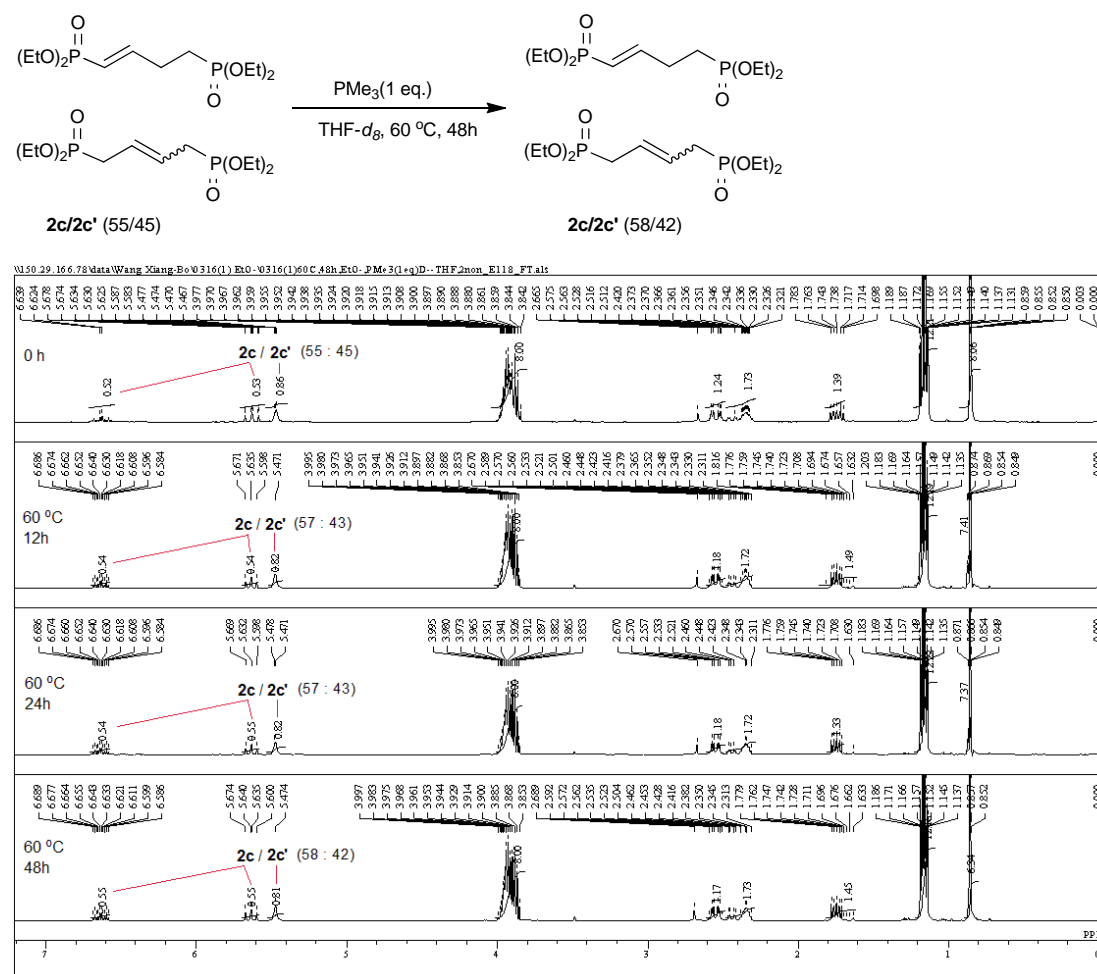

Figure 1.

### Synthesis of **9** and **9a**

Under nitrogen, a 20 mL tube containing a magnetic stir bar was charged with vinylphosphonate **1c** (0.272 mL, 1.6 mmol), 2.4 mL THF and 0.8 mL  $\text{H}_2\text{O}$ . After stirring at RT for 5 min.,  $\text{PMe}_3/\text{THF}$  (1.0 mol/L, 0.4 mL) was added with a syringe then stirred at RT for 12h. After removal of the solvent and  $\text{PMe}_3$  under a reduced pressure, the crude product was obtained as a white solid, then pure **9** was obtained by washing with  $\text{CHCl}_3$  and hexane in 92 % yield (0.312 g). The structure of **9** was determined by X-ray analysis.

White solid, m.p.  $69\text{--}72^\circ\text{C}$ .  $^1\text{H}$  NMR (500 MHz,  $\text{D}_2\text{O}$ ):  $\delta$  3.89–3.83 (m, 2H), 2.32–2.24 (m, 12H), 1.82–1.81 (d,  $J = 6.1\text{ Hz}$ , 9H), 1.80–1.69 (m, 2H), 1.20–1.17 (m, 2H).  $^{31}\text{P}$  NMR (200 MHz,  $\text{D}_2\text{O}$ ): 28.7 (d,  $J = 63.9\text{ Hz}$ ), 22.9 (d,  $J = 61.9\text{ Hz}$ ).  $^{13}\text{C}$  NMR (125 MHz,  $\text{D}_2\text{O}$ ):  $\delta$  61.1 (d, 5.8 Hz), 18.8 (dddd,  $J = 5.8\text{ Hz}$ , 3.8 Hz, 3.8 Hz, 4.8 Hz), 16.1 (d, 5.8 Hz), 7.2, 6.7.

**d-9** was synthesized following the same procedure using  $\text{D}_2\text{O}$  (Figure 2).

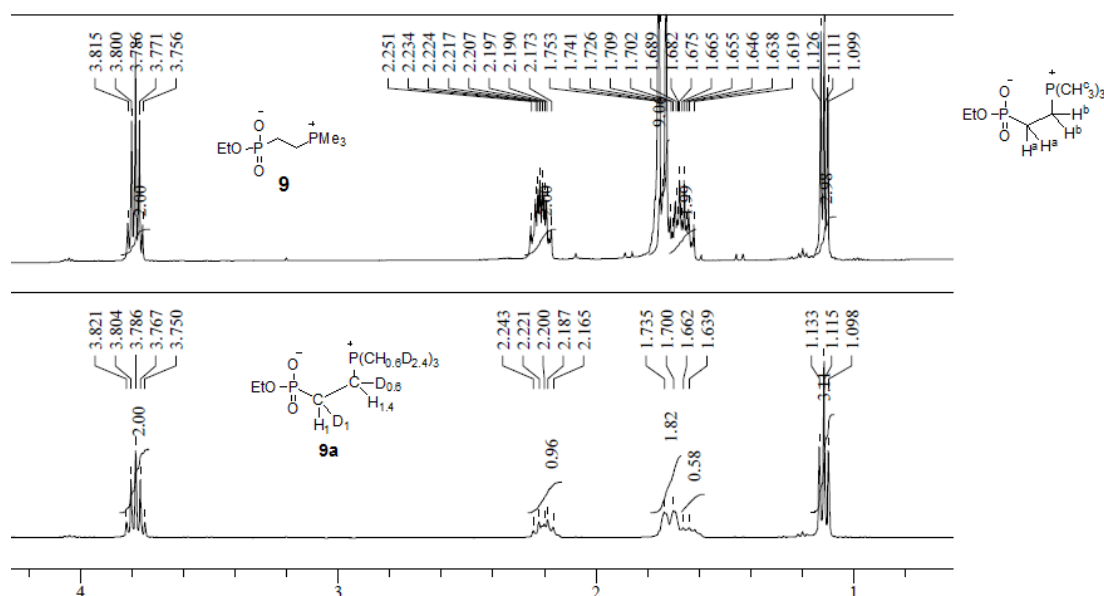

**Figure 2.**  $^1\text{H}$  NMR spectra of **9** and **d-9**:  $\text{H}^a$ ,  $\text{H}^b$  and  $\text{H}^c$  were deuterated.

### Reaction of Diethyl Vinylphosphonate (**1c**) with Aldehydes

General procedure: into a nitrogen-charged tube was placed diethyl vinylphosphonate **1c** (0.4 mmol), aldehyde (0.4 mmol) and 0.6 mL DMF with 0.1 eq  $\text{H}_2\text{O}$  in it. Then  $\text{PMe}_3/\text{THF}$  (1.0 mol/L, 0.4 mL) was added with a syringe and stirred at RT. The reaction was monitored by GC until the reactant disappeared. After removal of the solvent and  $\text{PMe}_3$  under a reduced pressure, the crude product was passed through a silica gel column using hexane then EtOAc/hexane (1/5) as eluent to give corresponding olefin. (E)-diethyl 4-methoxycinnamylphosphonate, 45 % yield. (E)-diethyl cinnamylphosphonate, 65 % yield. (S. Ghosh, S. U. Kumar, J. Shashidhar. *J. Org. Chem.* **2008**, 73, 1582-1585; N. N. Demik, M. M. Kabachnik, Z. S. Novikova, I. P. Beletskaya, *Russ. J. Org. Chem.* **1994**, 30, 935-940)

(E)-diethyl cinnamylphosphonate

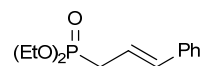

$^1\text{H}$  NMR (400 MHz,  $\text{CDCl}_3$ ):  $\delta$  7.35–7.17 (m, 5H), 6.52–6.46 (dd,  $J$ = 4.8, 5.2 Hz, 1H), 6.18–6.09 (m, 1H), 4.15–4.02 (m, 4H), 2.77–2.69 (m, 2H), 1.31–1.24 (m, 6H).  $^{31}\text{P}$  NMR (200 MHz,  $\text{CDCl}_3$ ): 27.6.  $^{13}\text{C}$  NMR (100 MHz,  $\text{CDCl}_3$ ):  $\delta$  136.8 ( $J_{\text{C,P}}$  = 2.8 Hz), 134.7 ( $J_{\text{C,P}}$  = 15.3 Hz), 128.6, 127.6, 126.2, 118.9 ( $J_{\text{C,P}}$  = 11.6 Hz), 62.1 ( $J_{\text{C,P}}$  = 6.7 Hz), 31.9 ( $J_{\text{C,P}}$  = 139.8 Hz), 16.6 ( $J_{\text{C,P}}$  = 5.7 Hz).

(E)-diethyl 4-methoxycinnamylphosphonate

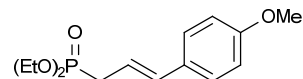

$^1\text{H}$  NMR (500 MHz,  $\text{CDCl}_3$ ):  $\delta$  7.34–7.33 (d,  $J$ =8.5 Hz, 2H), 7.89–7.88 (d,  $J$ =9.0 Hz, 2H), 6.53–6.49 (dd,  $J$ =5.0, 5.0 Hz, 1H), 1.37–1.37 (t, 6H).  $^{31}\text{P}$  NMR (200 MHz,  $\text{CDCl}_3$ ): 27.2.  $^{13}\text{C}$  NMR (125 MHz,  $\text{CDCl}_3$ ):  $\delta$  159.6, 134.6 ( $J_{\text{C,P}}$  = 14.4 Hz), 130.2 ( $J_{\text{C,P}}$  = 3.1 Hz), 127.8 ( $J_{\text{C,P}}$  = 2.0 Hz), 116.9 ( $J_{\text{C,P}}$  = 12.4 Hz), 114.4, 62.5 ( $J_{\text{C,P}}$  = 6.1 Hz), 55.7, 32.0 ( $J_{\text{C,P}}$  = 139.6 Hz), 17.0 ( $J_{\text{C,P}}$  = 6.3 Hz).



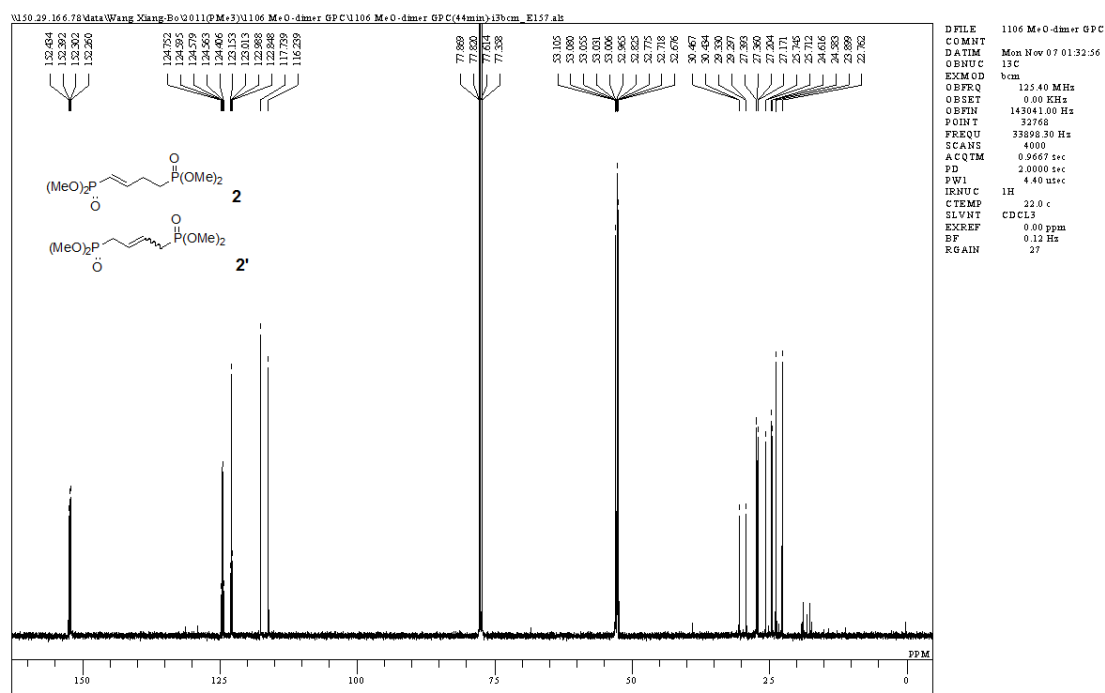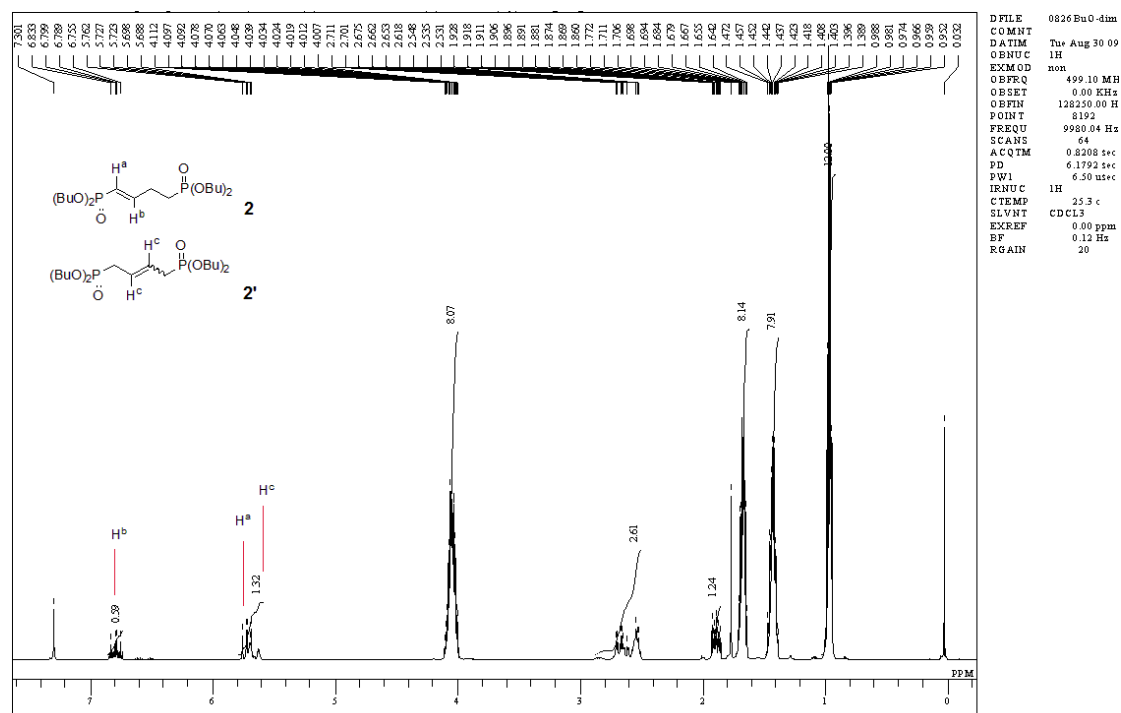

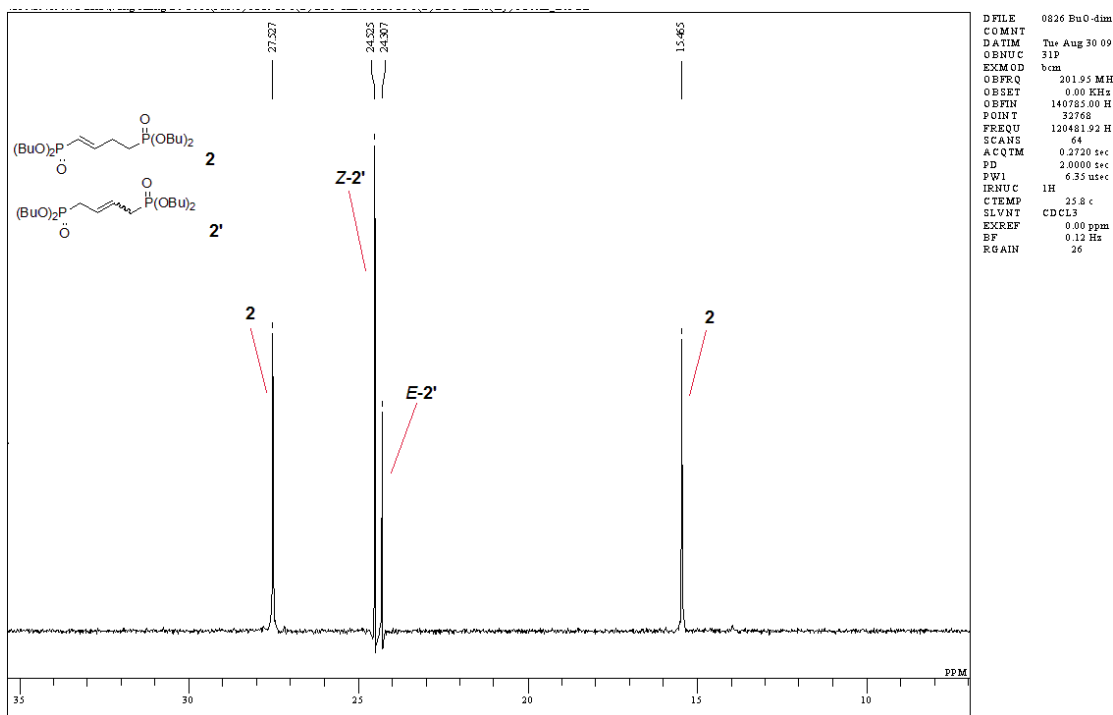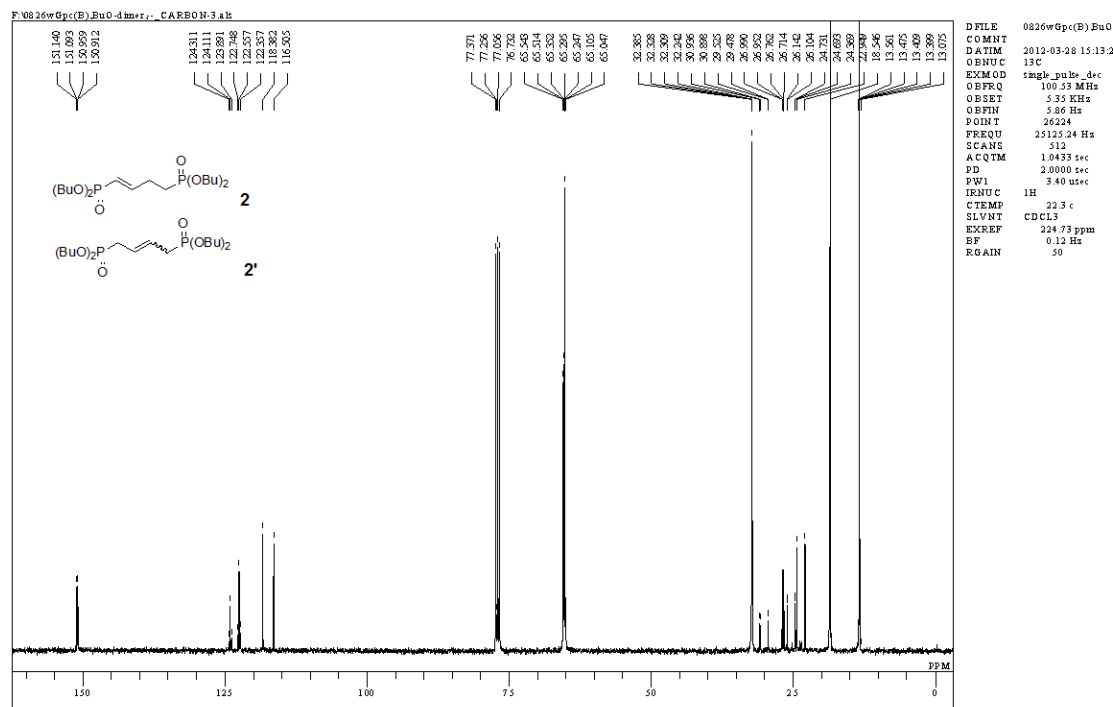

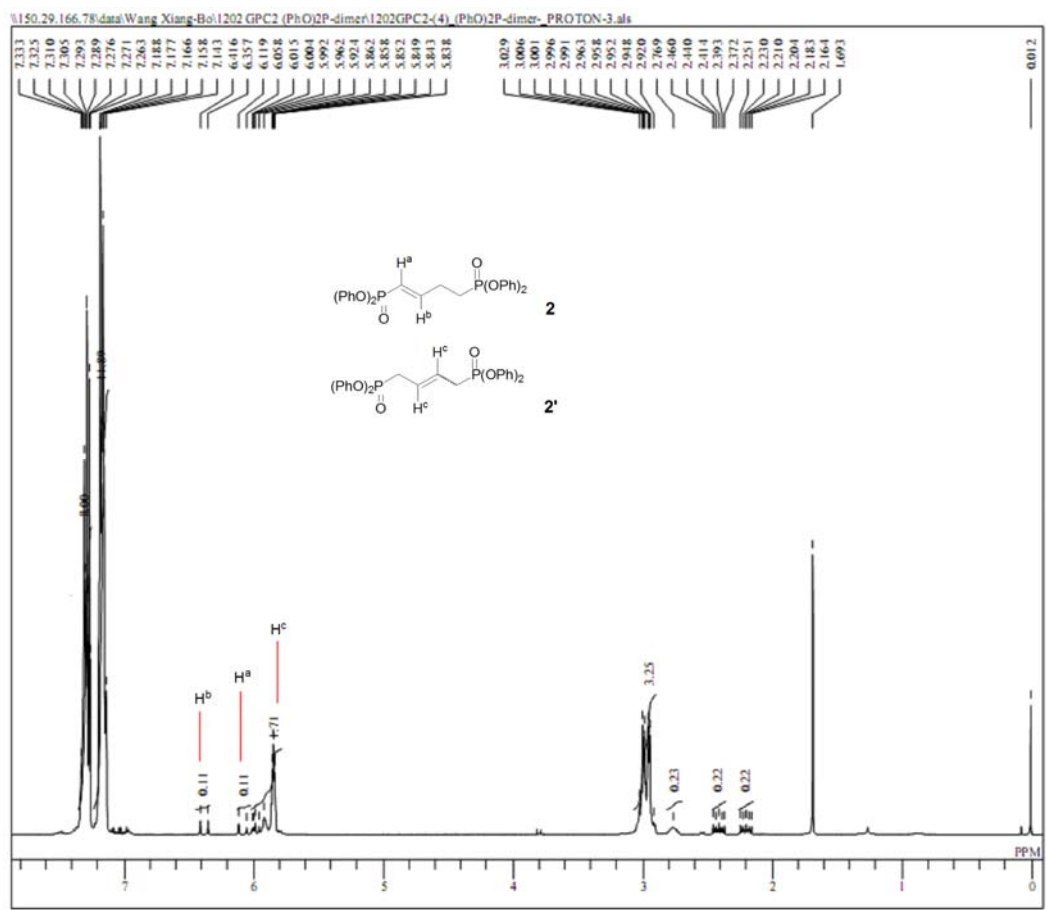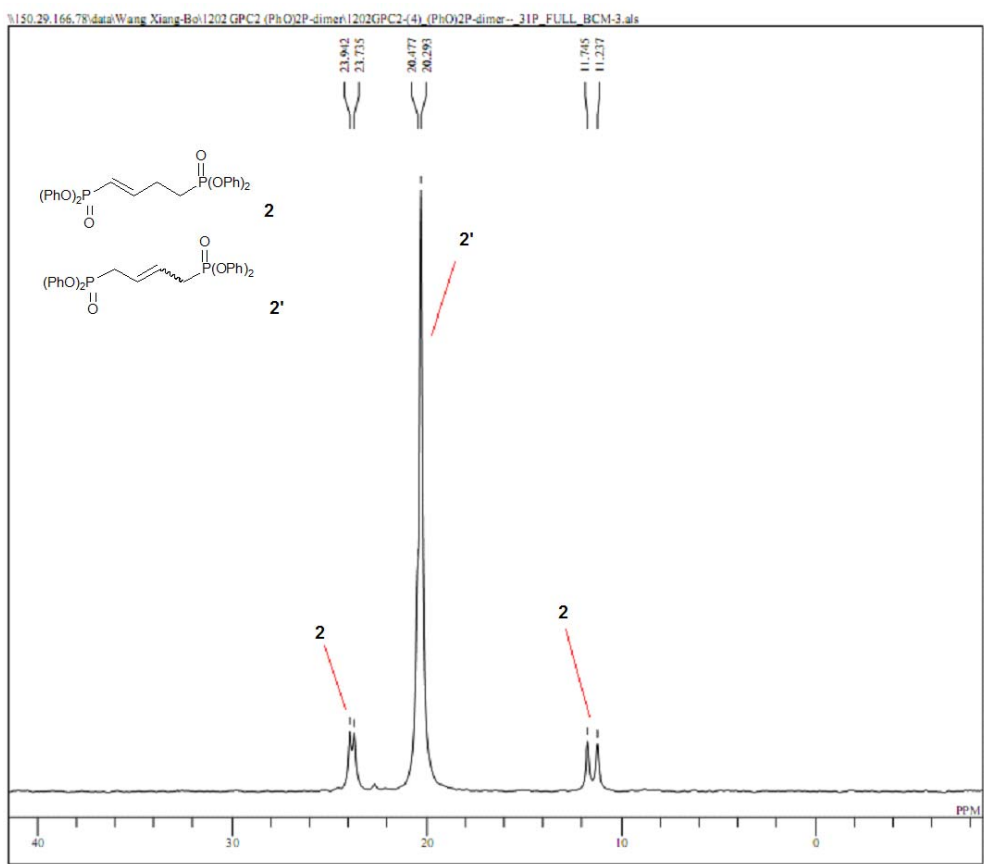

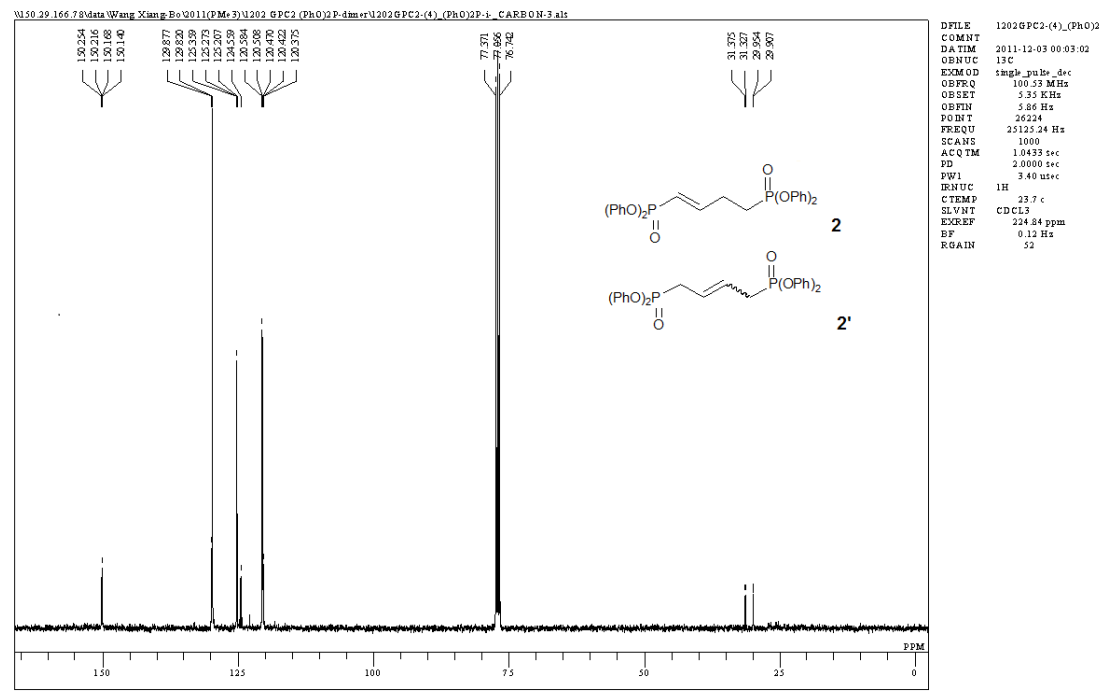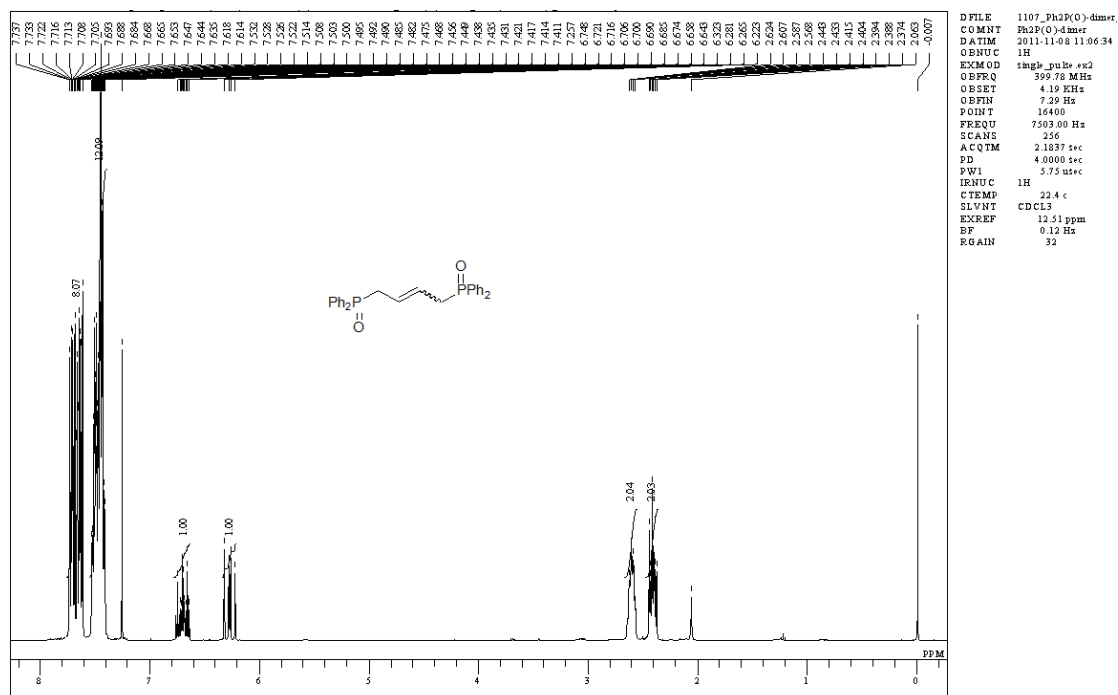

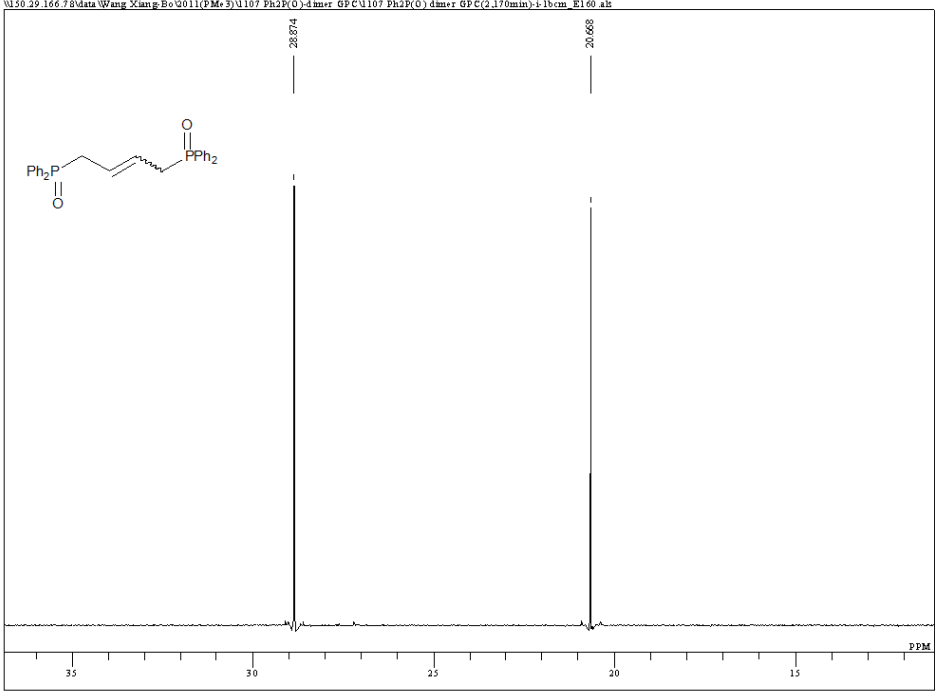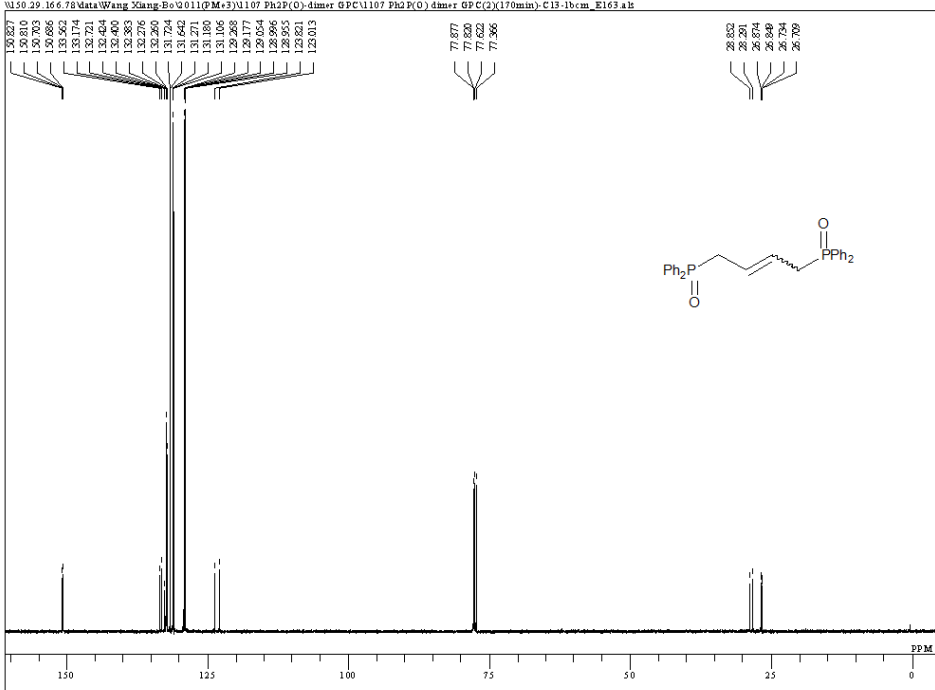

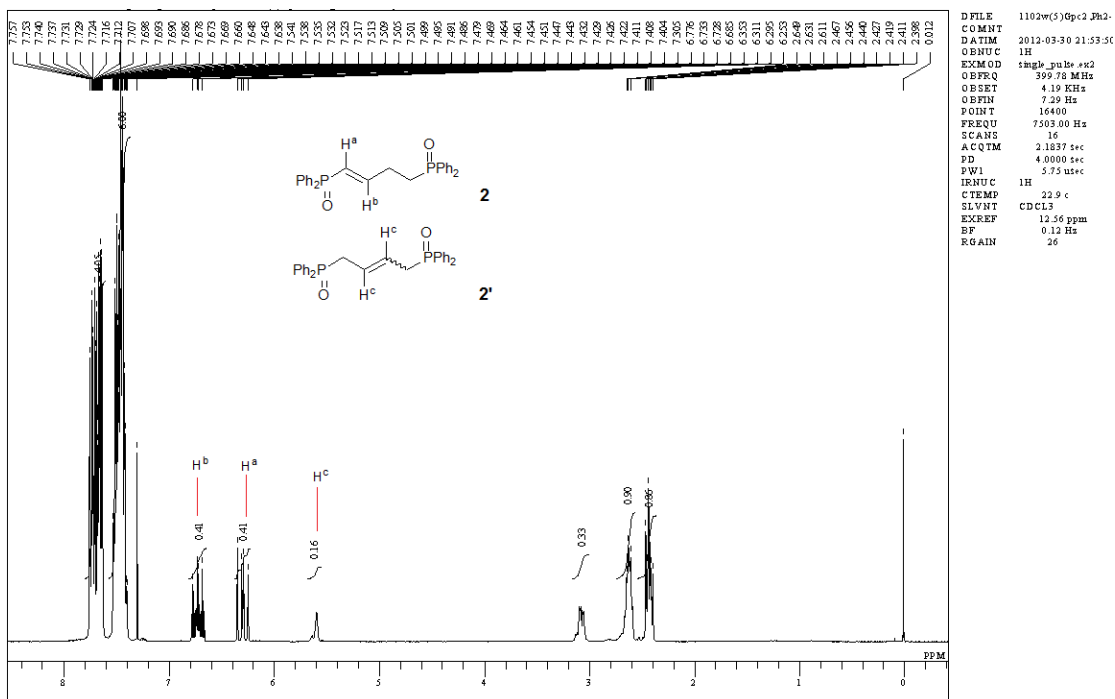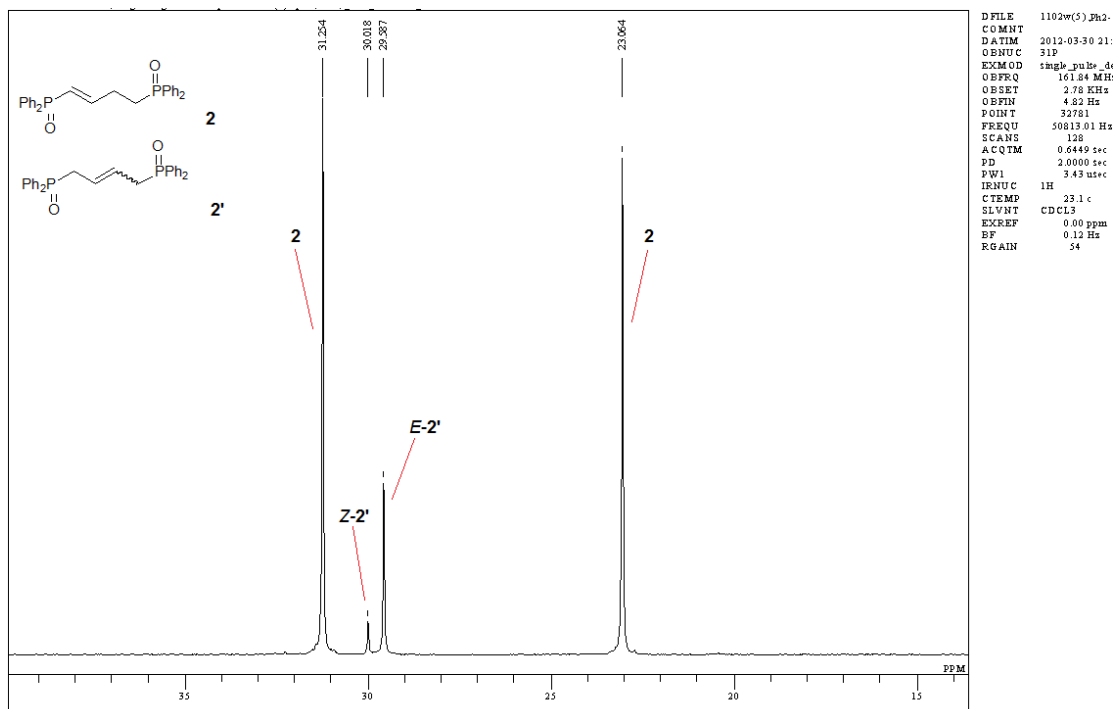

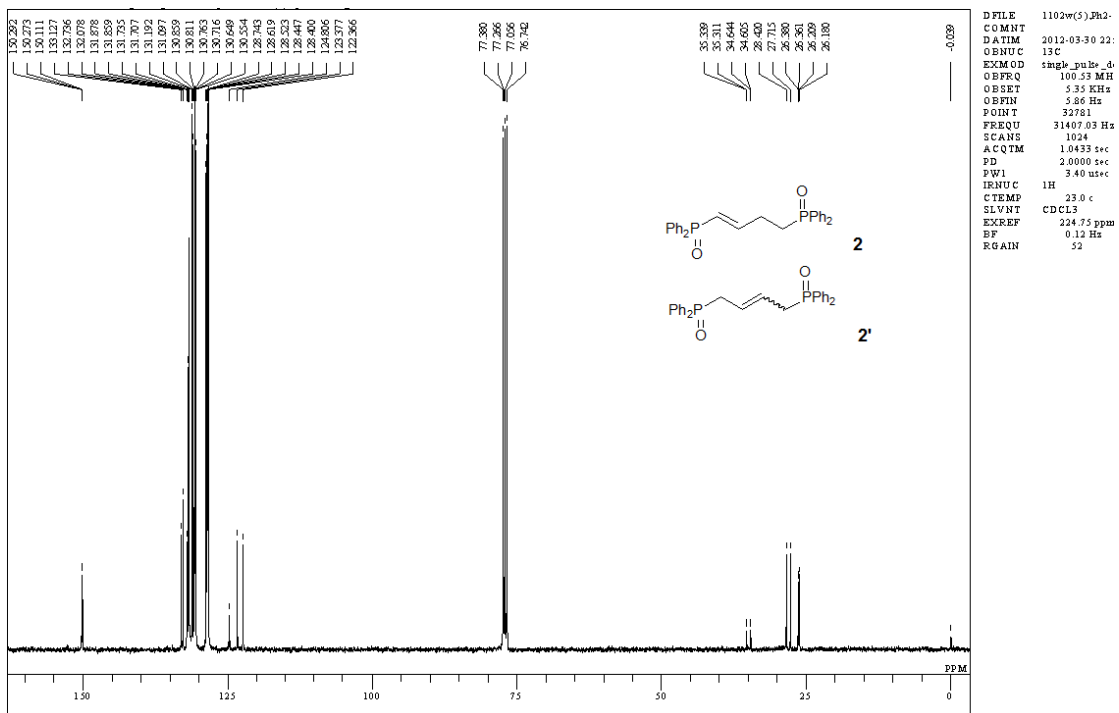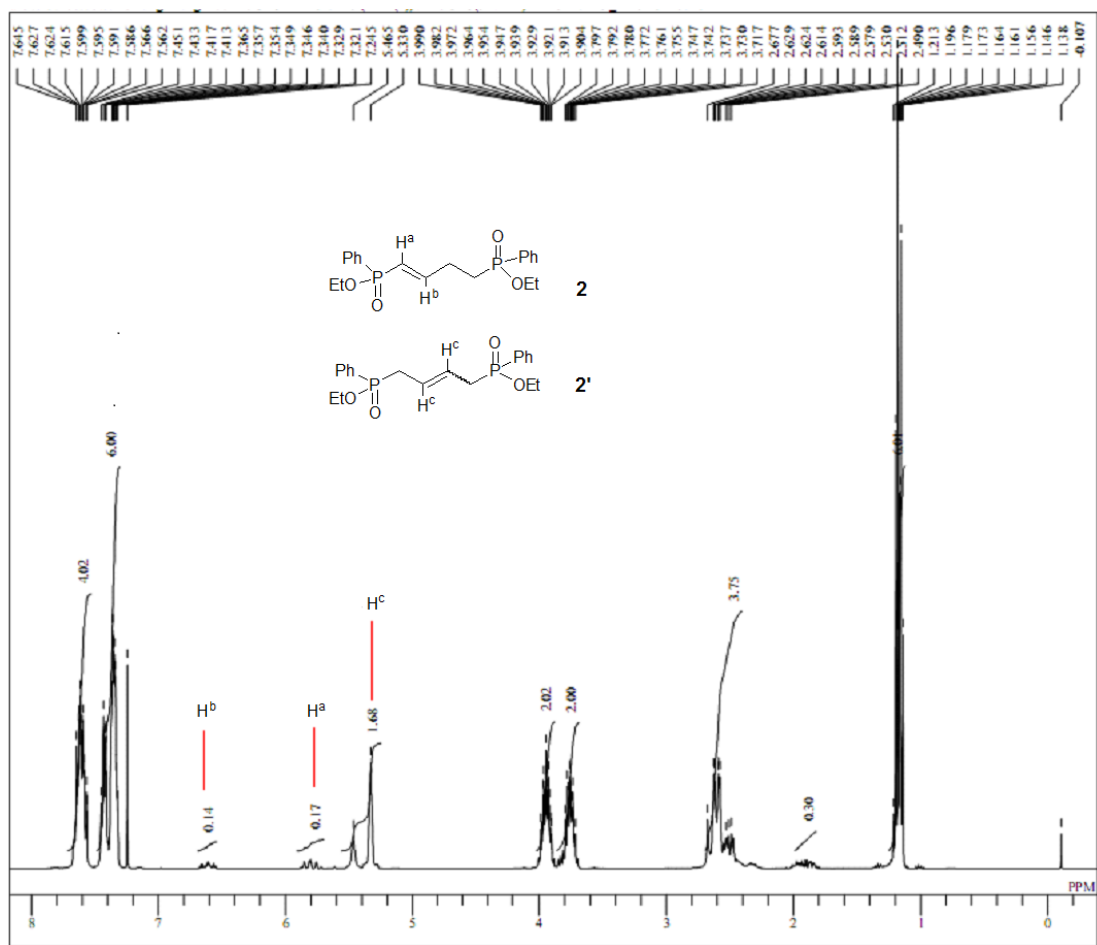

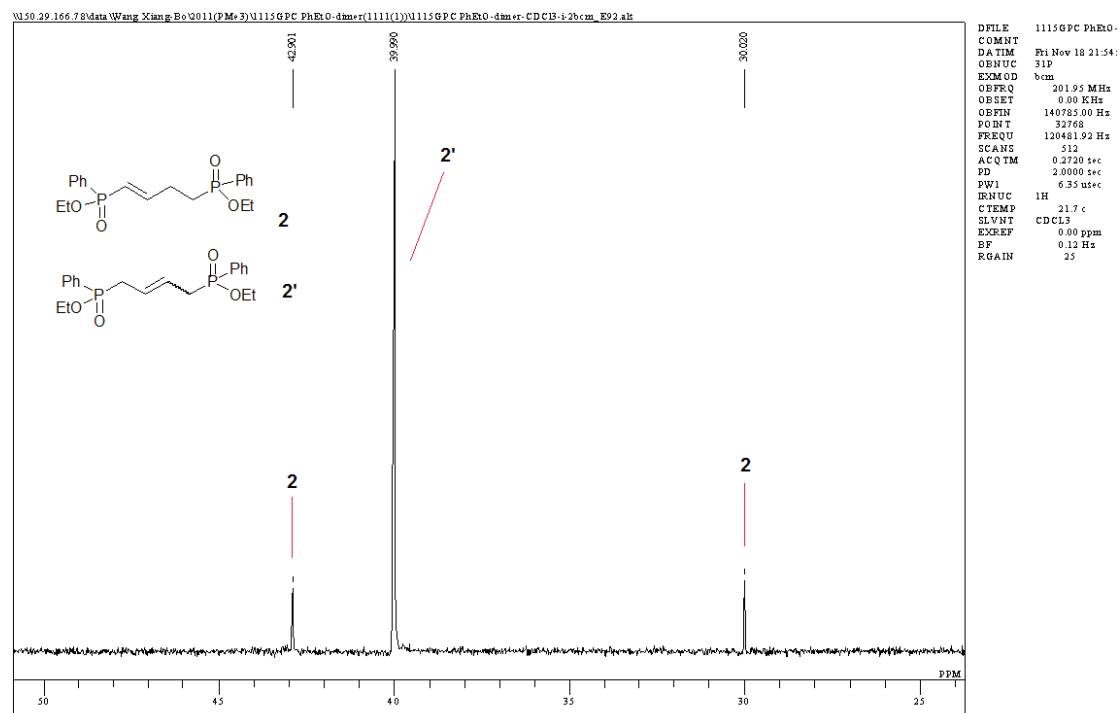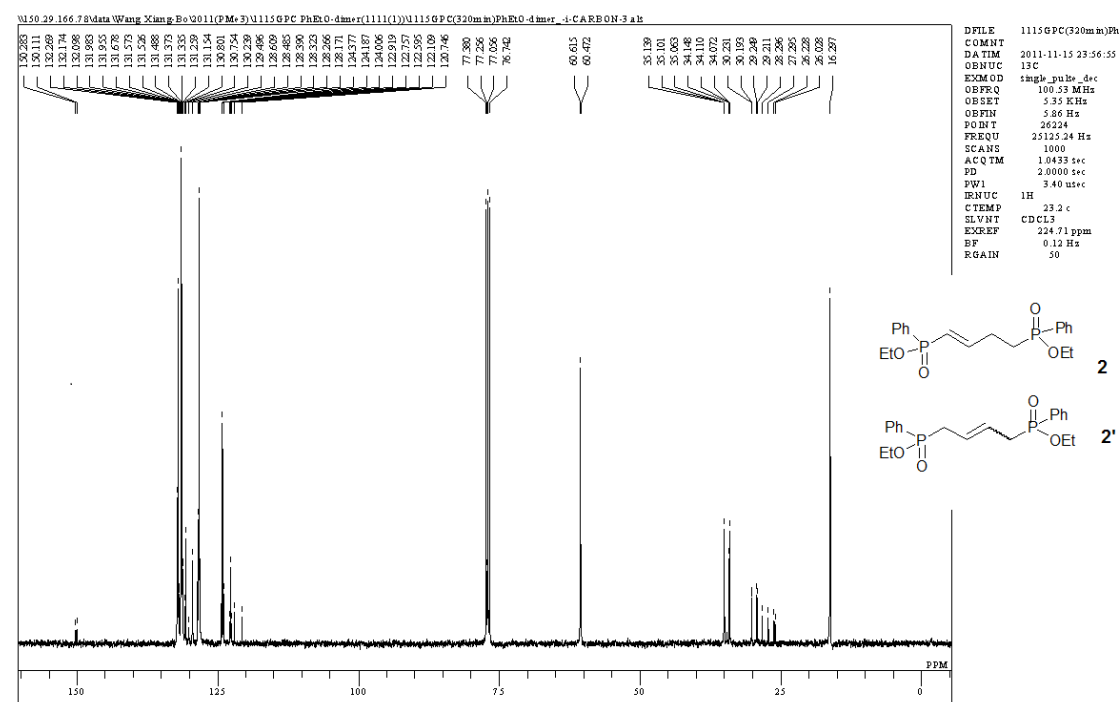

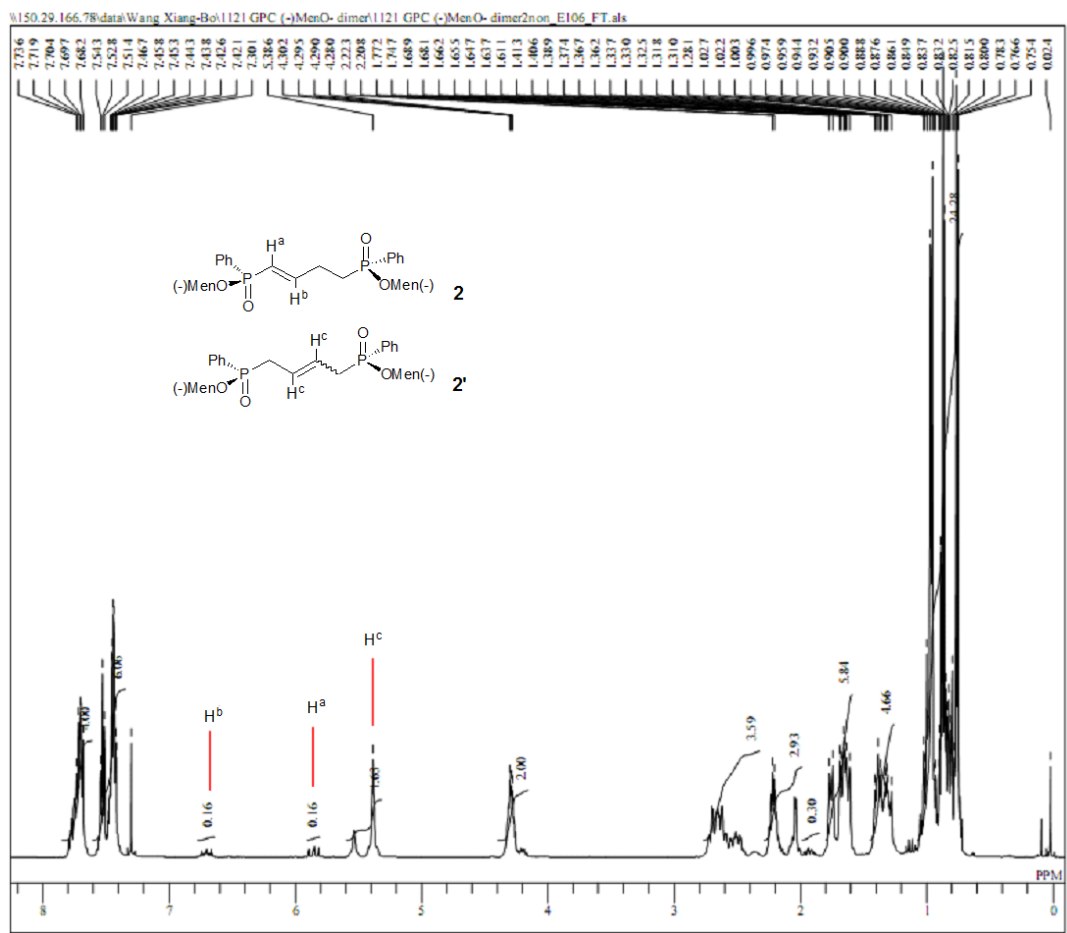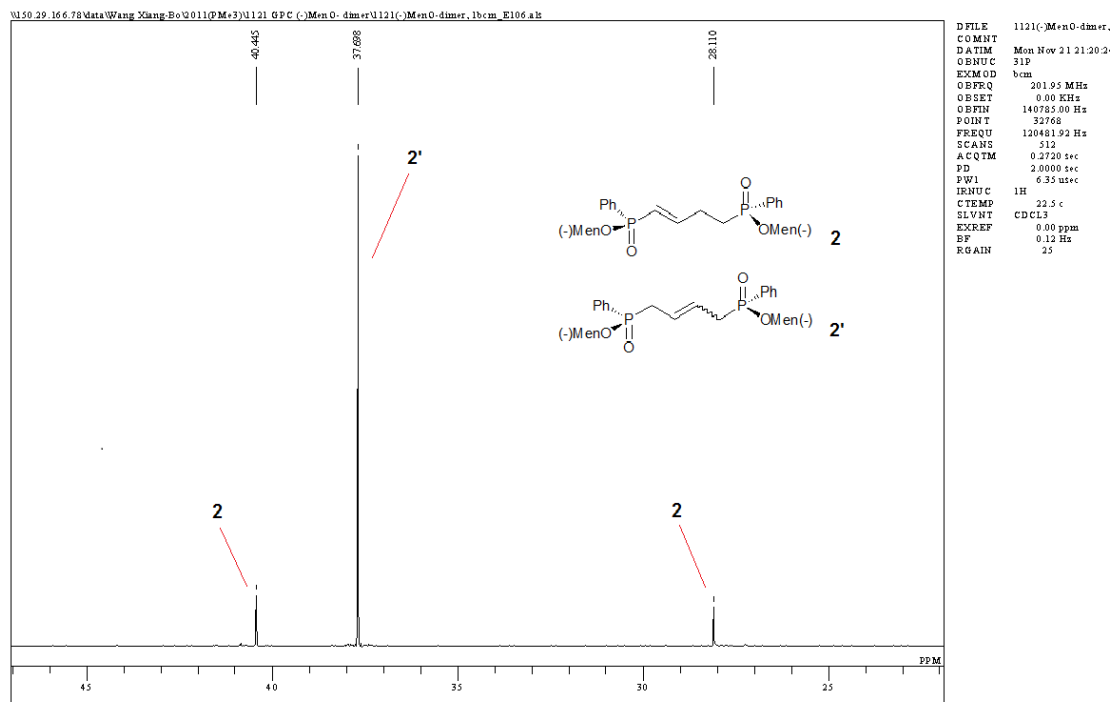

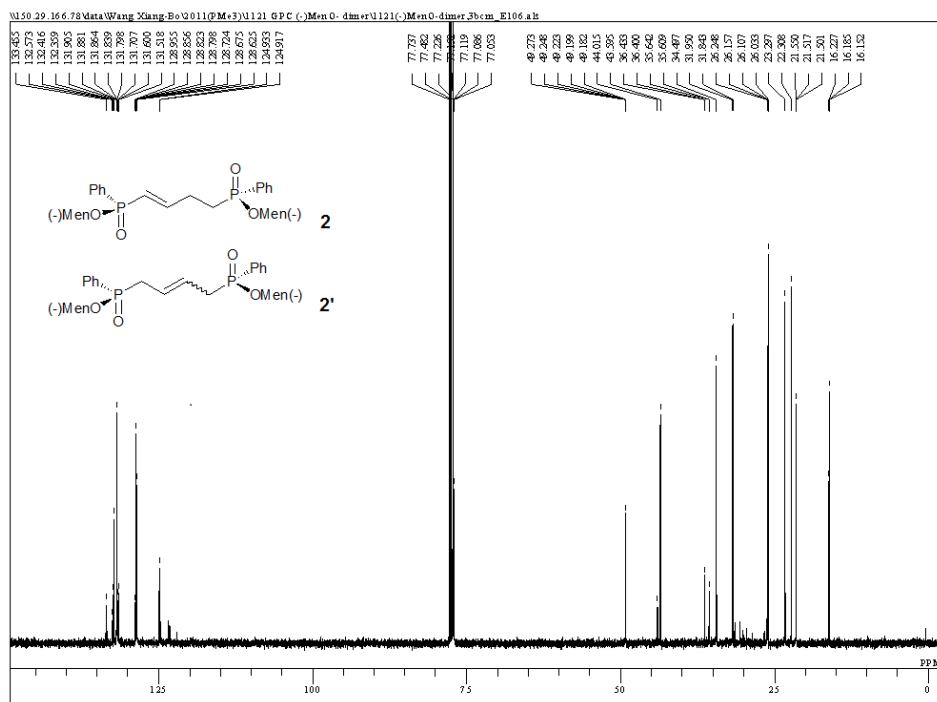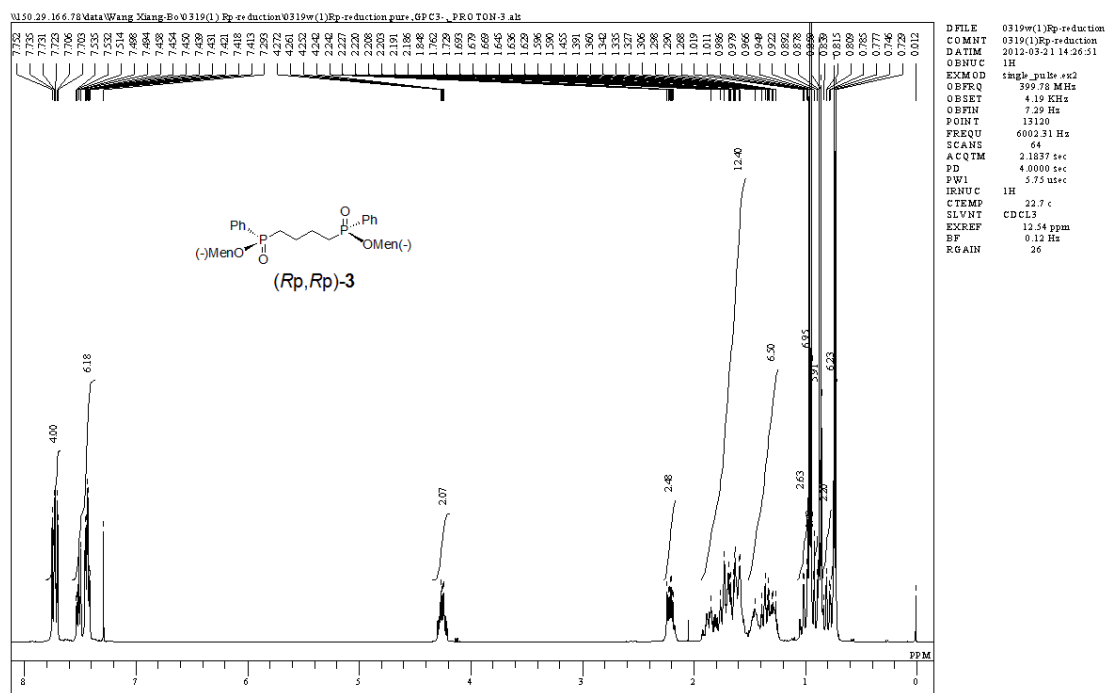

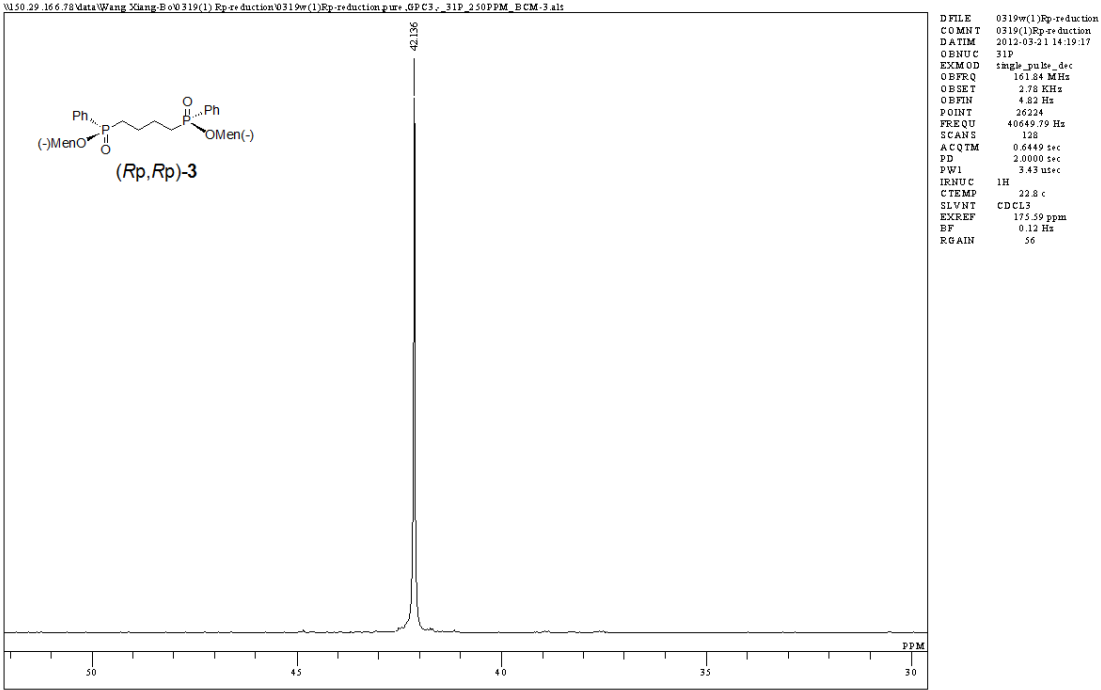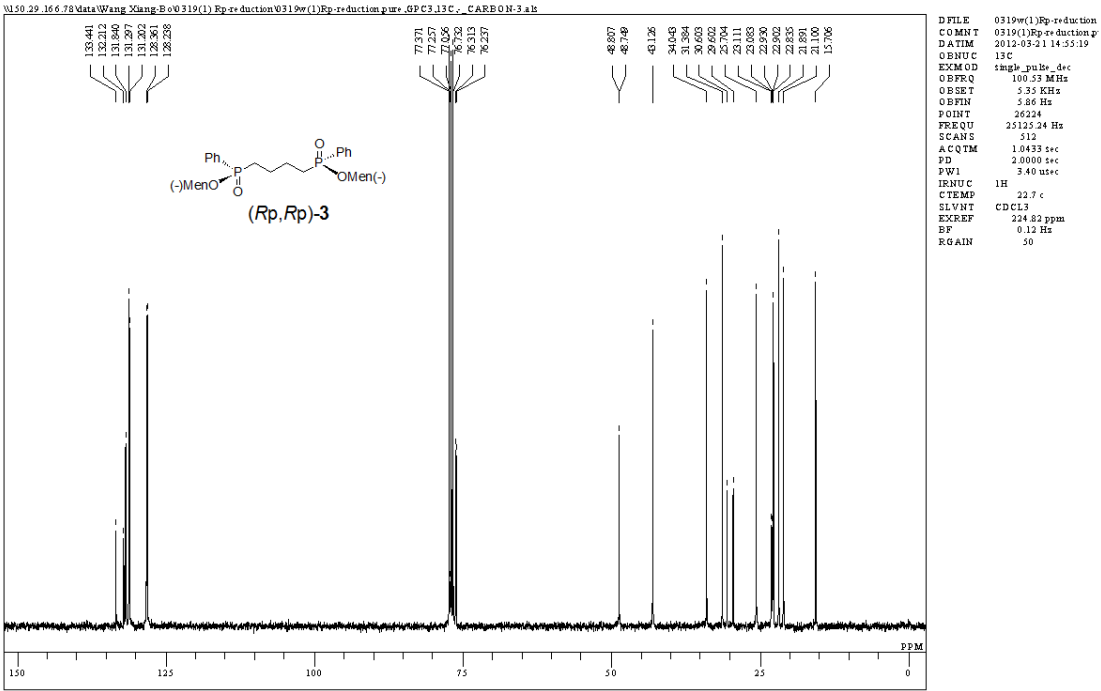

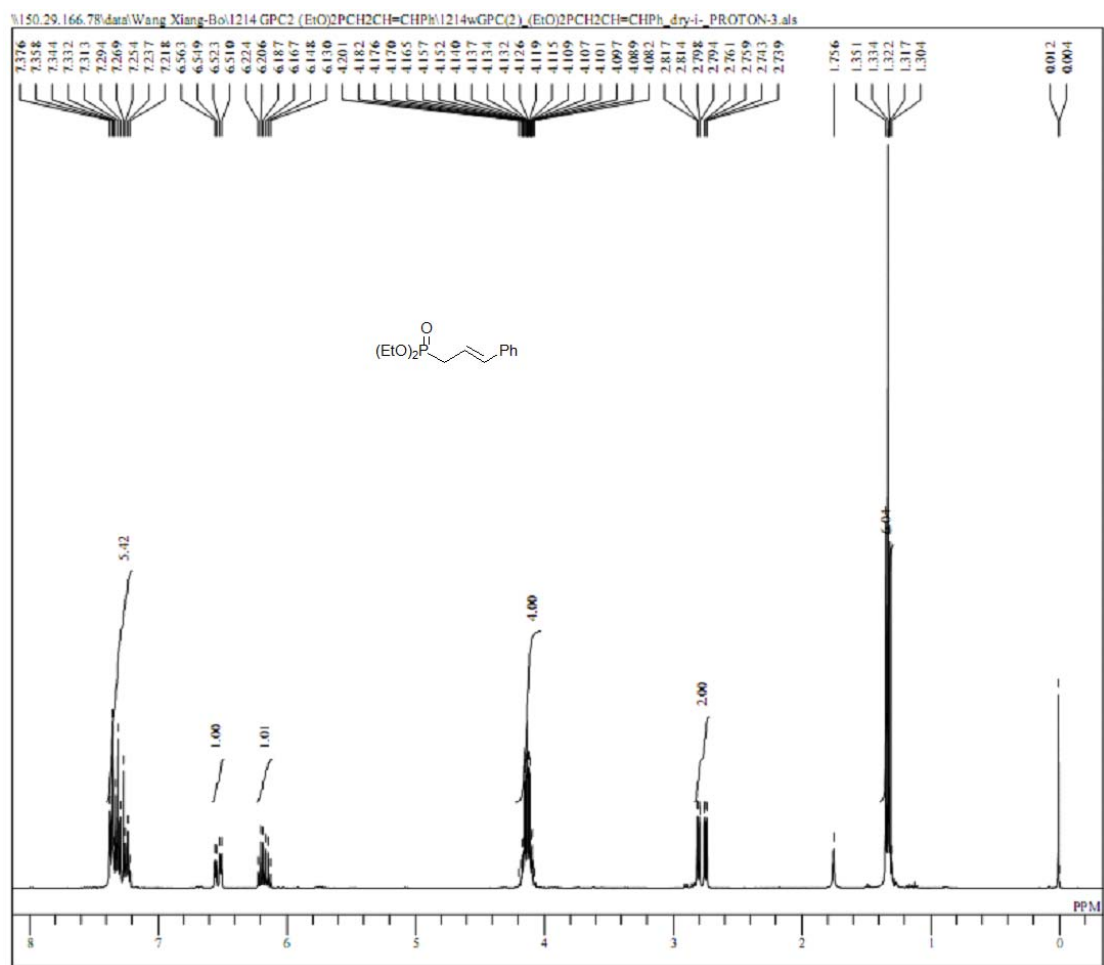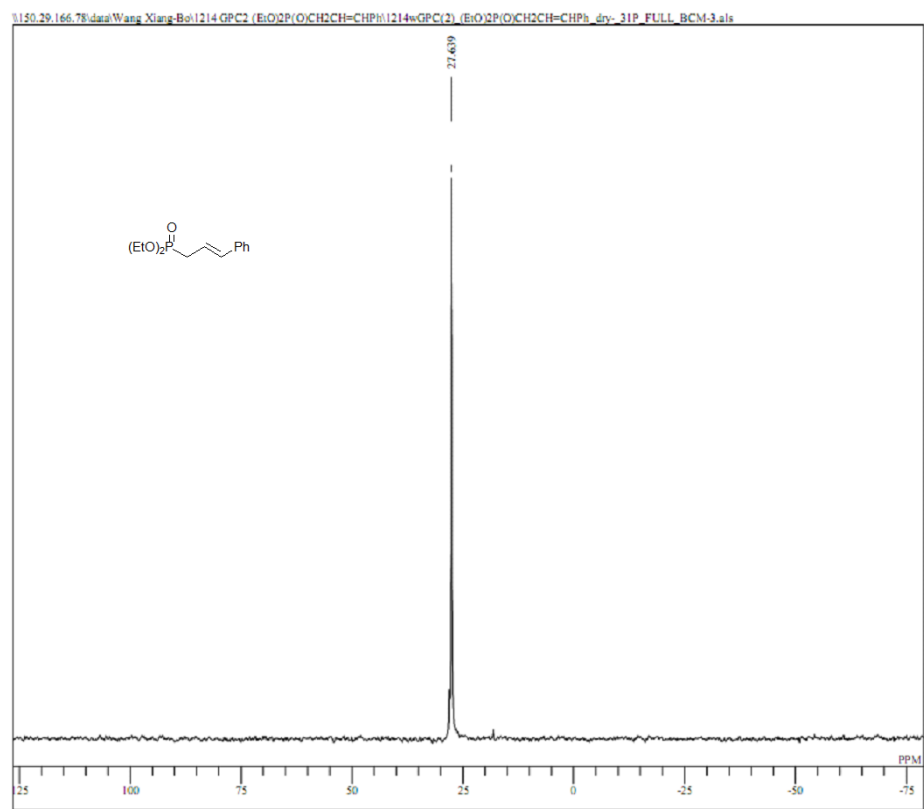

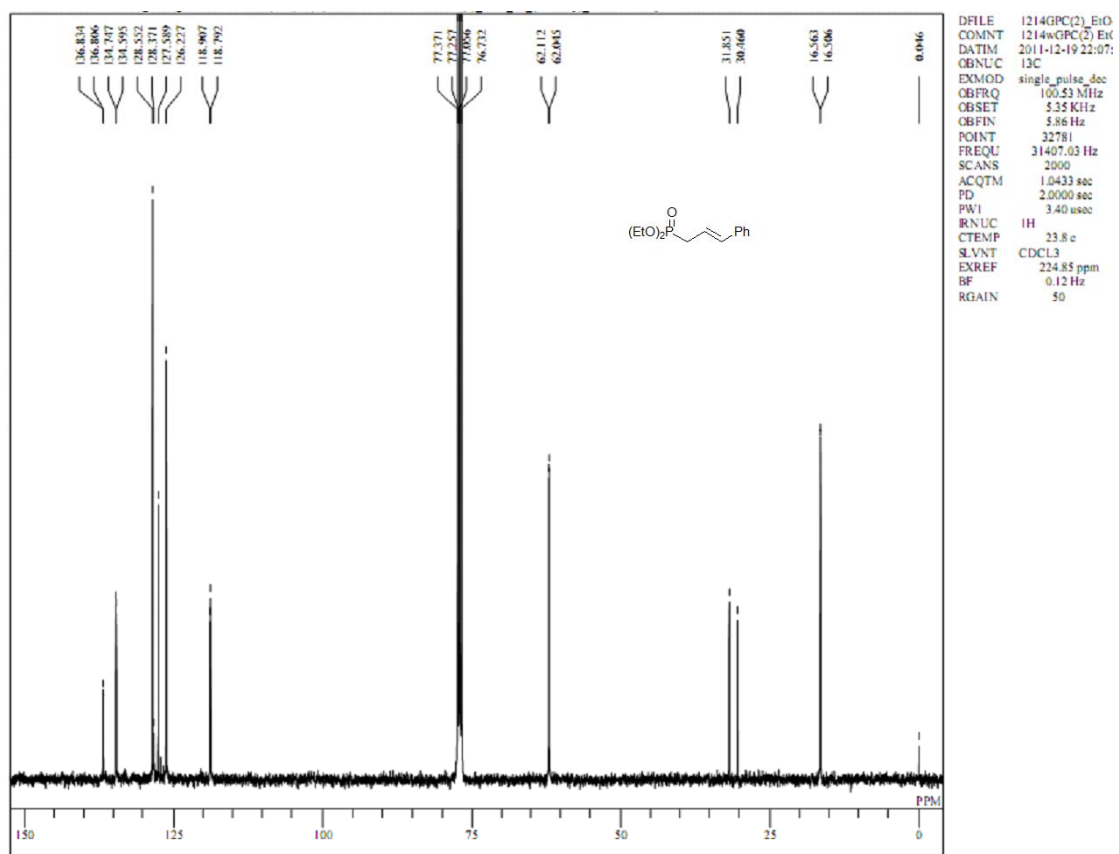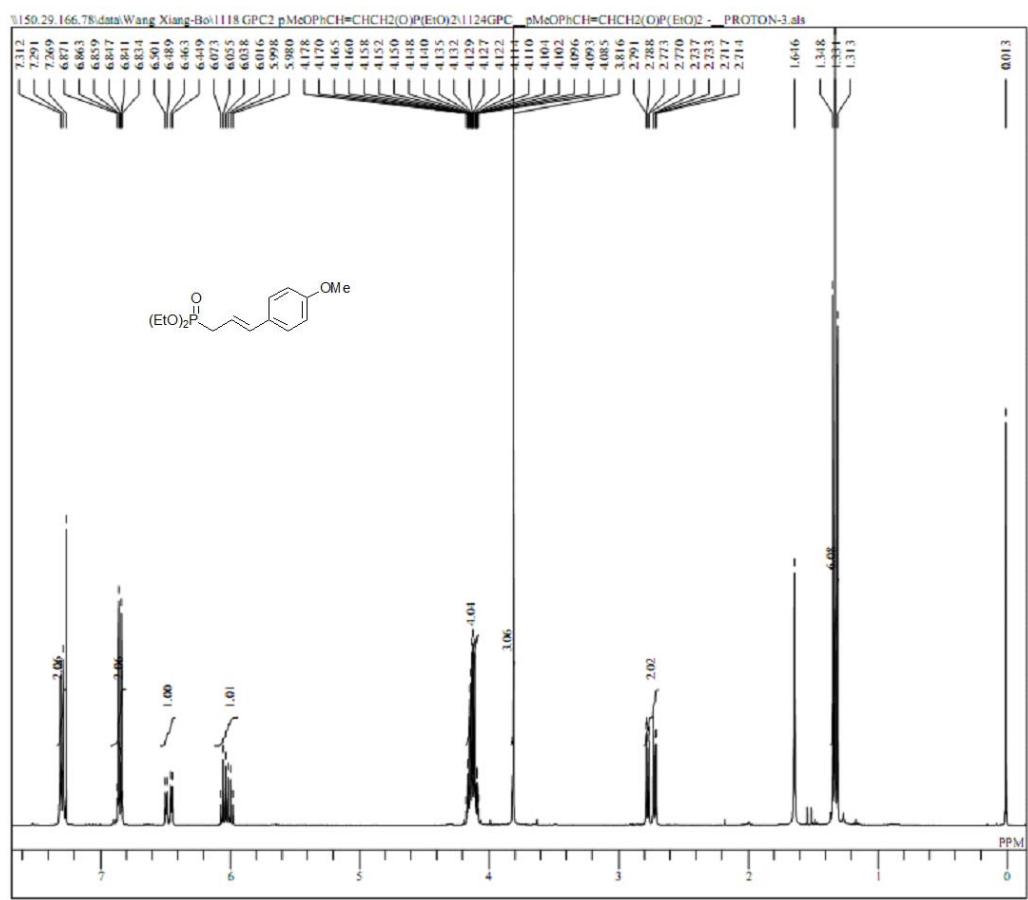

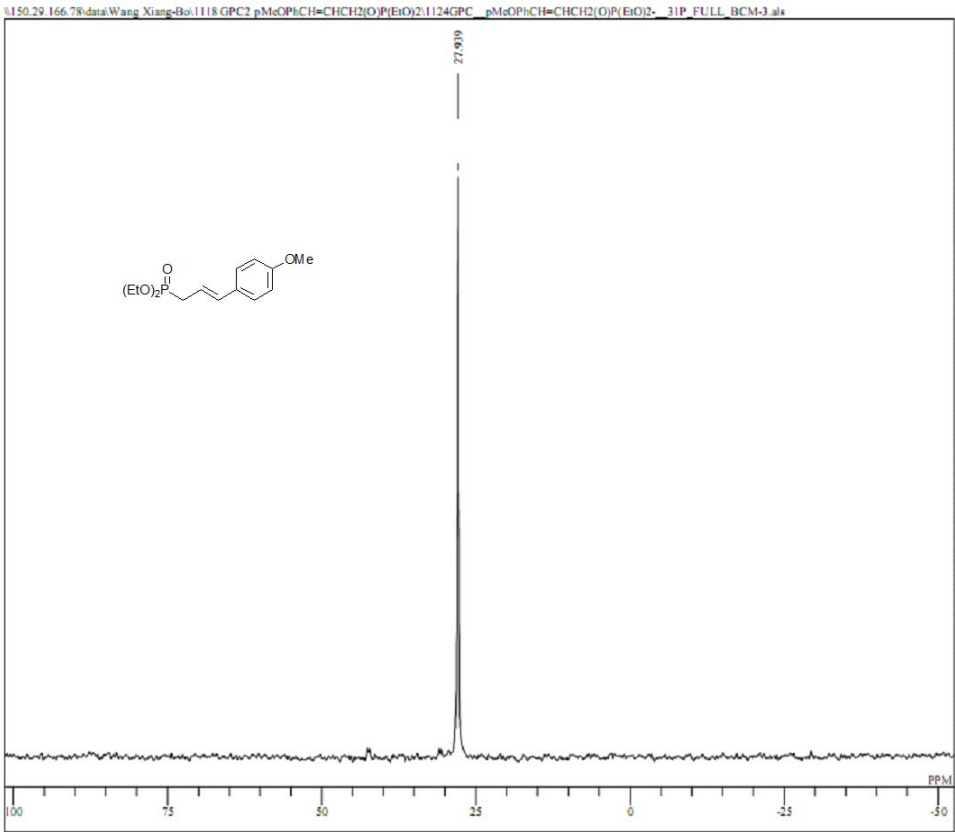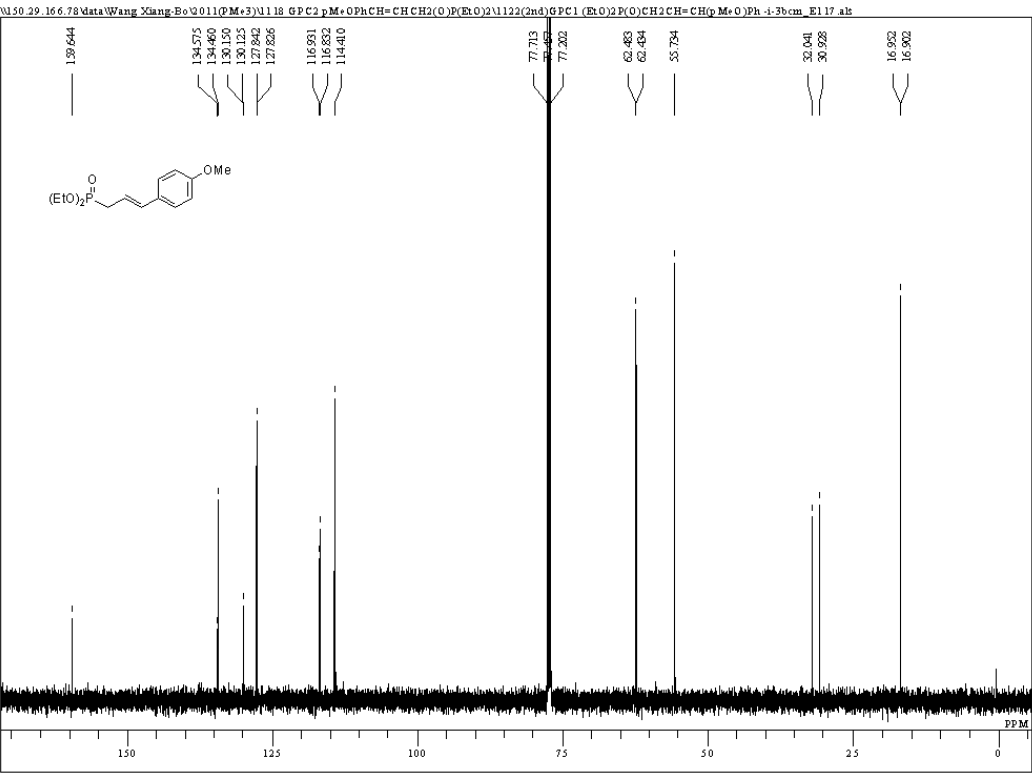

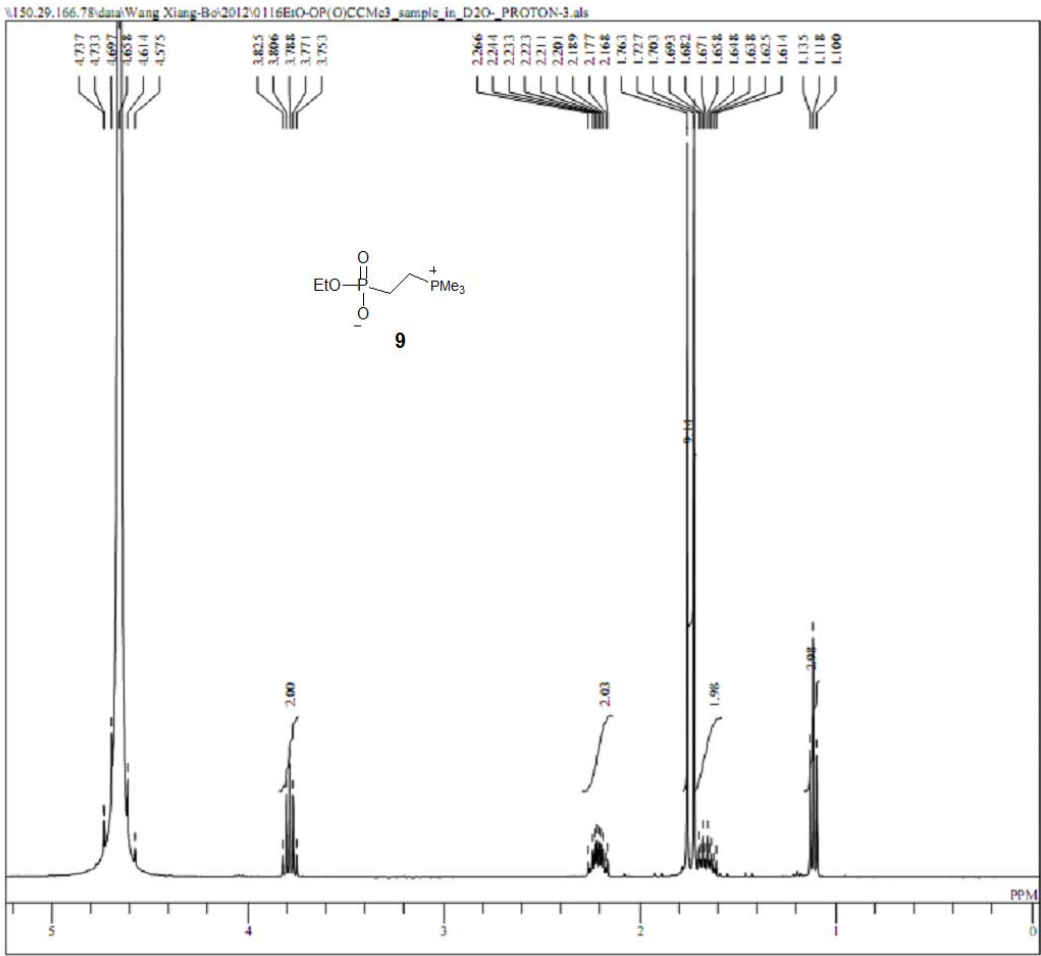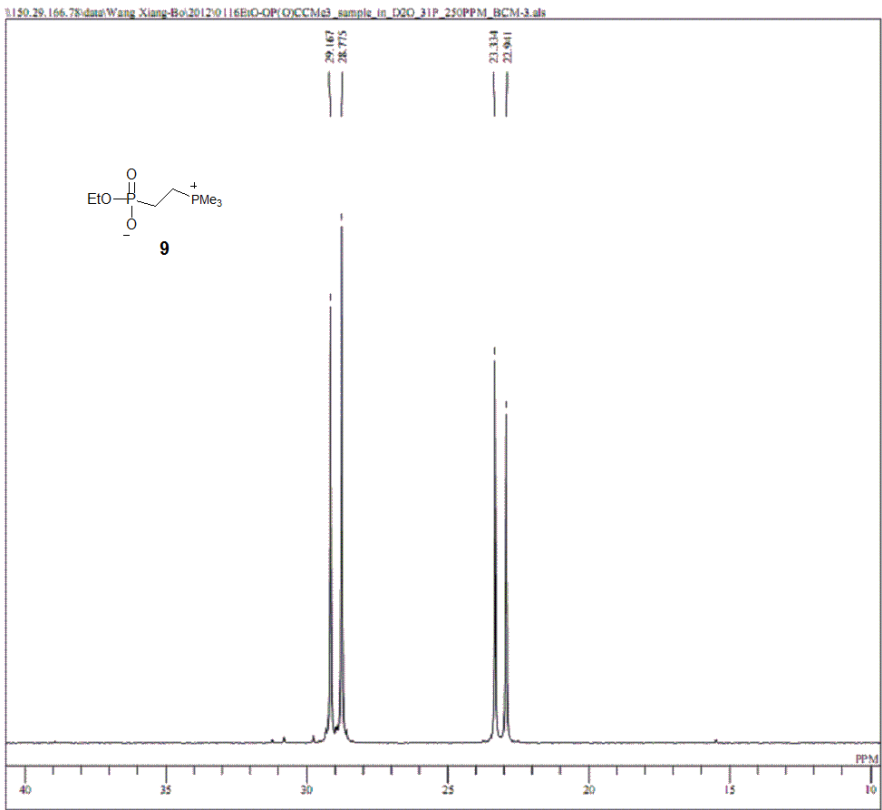

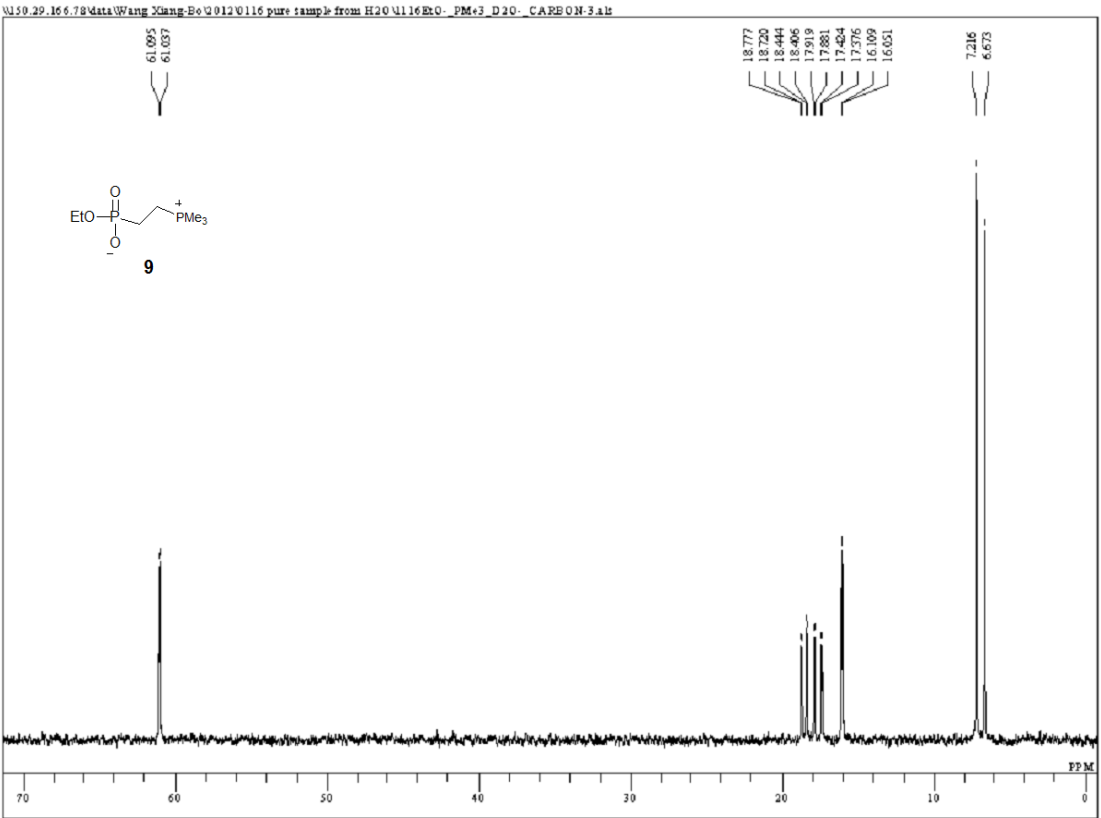

Supplement: c2ra20704d.pdf [file c2ra20704d.pdf]
